# Supplementary material for: Randomised, controlled trial of avocado–soybean unsaponifiable (Piascledine) effect on structure modification in hip osteoarthritis: the ERADIAS study
Source: PubMed Central journal article supplement — Ann Rheum Dis. 2013 Jan 23;73(2):376–84. doi: 10.1136/annrheumdis-2012-202485 (PMC3913295; doi:10.1136/annrheumdis-2012-202485), 2013-01-23
Supplement: annrheumdis-2012-202485-s1.pdf [file annrheumdis-2012-202485-s1.pdf]

**Table S1** : Sensitivity analyses of the primary outcome, using the Last Observation Carried Forward, or the case-observed approach, and on target hip AP views only for both JS loss and the rates of progressors, in the FAS population.

|                                                                           | <b>Placebo</b> | <b>ASU</b>   | <b>P value</b>     | <b>OR / Diff.</b> | <b>95%CI</b>  |
|---------------------------------------------------------------------------|----------------|--------------|--------------------|-------------------|---------------|
|                                                                           | <i>n=179</i>   | <i>n=166</i> |                    |                   |               |
| <b>LOCF - Mean Variation of minimal JSW (mm) (sem)</b>                    | -0.57 (0.05)   | -0.53 (0.05) | 0.607 <sup>b</sup> | 0.04 (0.07)       | -0.11 ; 0.18  |
| <b>LOCF - % progressors (progressor = JS loss ≥ 0.5 mm over 3 years)</b>  | 47.5%          | 38.6%        | 0.063 <sup>a</sup> | 0.6250            | 0.412 ; 1.024 |
|                                                                           | <i>n=127</i>   | <i>n=104</i> |                    |                   |               |
| <b>Case-observed - Mean Variation of minimal JSW (mm) (sem)</b>           | -0.51 (0.06)   | -0.41 (0.06) | 0.229 <sup>b</sup> | 0.10 (0.09)       | -0.07 ; 0.27  |
| <b>Case-observed - % progressors</b>                                      | 43.3%          | 31.1%        | 0.050 <sup>a</sup> | 0.567             | 0.322 ; 1.000 |
|                                                                           | <i>n=174</i>   | <i>n=164</i> |                    |                   |               |
| <b>AP target hip view only - Mean Variation of minimal JSW (mm) (sem)</b> | -0.69 (0.07)   | -0.64 (0.07) | 0.621 <sup>b</sup> | 0.05 (0.10)       | -0.15 ; 0.24  |
| <b>AP target hip view only - % progressors</b>                            | 50.0%          | 40.2%        | 0.050 <sup>a</sup> | 0.632             | 0.399 ; 0.999 |

AP : antero-posterior ; JS : Joint Space ; FAS: Full Analysis Set; P: probability; LOCF: Last Observation Carried Forward; JSW : Joint Space Width ; OR : Odds-Ratio ASU vs placebo ; Diff : Difference between ASU and placebo ; 95%CI : 95% Confidence Interval; <sup>a</sup> Cochran-Mantel-Haenzel test adjusted on strata; <sup>b</sup> ANOVA treatment effect

**Table S2** : Results of analyses on the primary outcome: JS loss measured on AP pelvis or target hip radiographs using manual radiochondrometry and rate of progressors, over the 3 year-duration of the trial, in the Per Protocol population (N = 279), according to the MAR-MMRM analysis model.

|                                                                   | Placebo<br>N = 147 | ASU<br>N = 132 | <i>P value</i>     | <b><i>OR /Diff.</i></b> | <b><i>95%CI</i></b> |
|-------------------------------------------------------------------|--------------------|----------------|--------------------|-------------------------|---------------------|
| <b>Mean Variation of minimal JSW (mm) (sem)</b>                   | -0.56 (0.06)       | -0.46 (0.06)   | 0.279 <sup>a</sup> | 0.09 (0.08)             | -0.07 ; 0.26        |
| <b>% progressors (progressor = JS loss ≥ 0.5 mm over 3 years)</b> | 45.6%              | 33.3%          | 0.032 <sup>b</sup> | 0.572                   | 0.344 ; 0.952       |

JS : Joint Space ; AP : antero-posterior ; MAR-MMRM: Missing at Random - Mixed Model for Repeated Measurements ; JSW : Joint Space Width ; OR : Odds-Ratio ASU vs placebo ; Diff : Difference between ASU and placebo ; 95%CI : 95% Confidence Interval ; <sup>a</sup> ANOVA treatment effect ; <sup>b</sup> Cochran-Mantel-Haenzel test adjusted on strata

**Table S3:** Results of the analyses on the primary outcome: JS loss measured on AP pelvis or target hip radiographs **using computer-assisted method for JS measurement** and rate of progressors, over the 3 year-duration of the trial, in the FAS population, according to the MAR-MMRM analysis model.

|                                                                   | <b>Placebo<br/>N = 179</b> | <b>ASU<br/>N = 166</b> | <i>P value</i>     | <i>OR / Diff.</i> | <i>95%CI</i>  |
|-------------------------------------------------------------------|----------------------------|------------------------|--------------------|-------------------|---------------|
| <b>Mean Variation of minimal JSW (mm) (sem)</b>                   | -0.69 (0.07)               | -0.65 (0.07)           | 0.700 <sup>a</sup> | 0.04 (0.10)       | -0.16 ; 0.24  |
| <b>% progressors (progressor = JS loss ≥ 0.5 mm over 3 years)</b> | 46.9%                      | 36.7%                  | 0.044 <sup>b</sup> | 0.622             | 0.392 ; 0.987 |

AP : antero-posterior ; JS : Joint Space ; FAS: Full Analysis Set; P: probability ; LOCF: Last Observation Carried Forward; JSW : Joint Space Width ; OR : Odds-Ratio ASU vs placebo ; Diff. : Difference between ASU and placebo ; 95%CI : 95% Confidence Interval ; <sup>a</sup> ANOVA treatment effect ; <sup>b</sup> Cochran-Mantel-Haenzel test adjusted on strata
